# Supplementary material
Source: Springer Nature journal article supplement (https://www.springermedizin.de/resource/supplementary/12943_2012_1199_MOESM10_ESM.pdf/9552378)

**A**

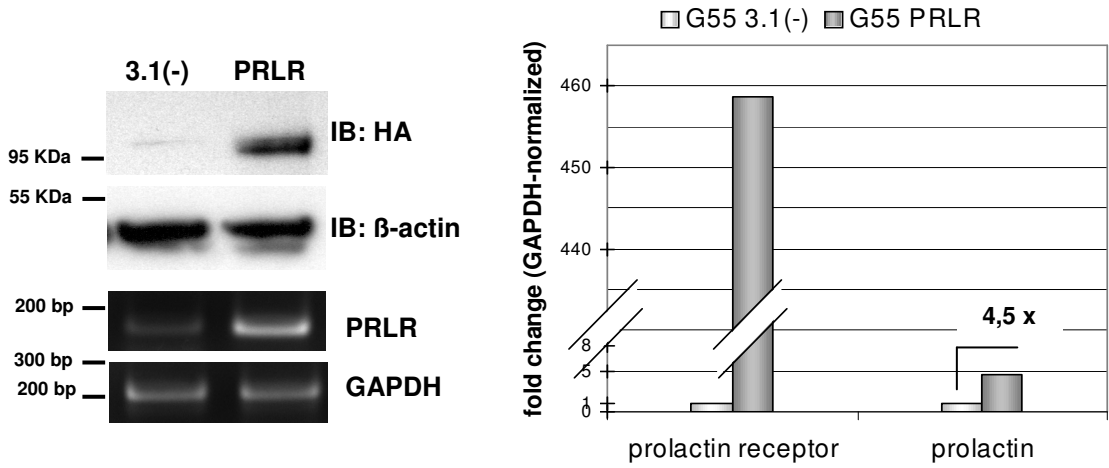

**B**

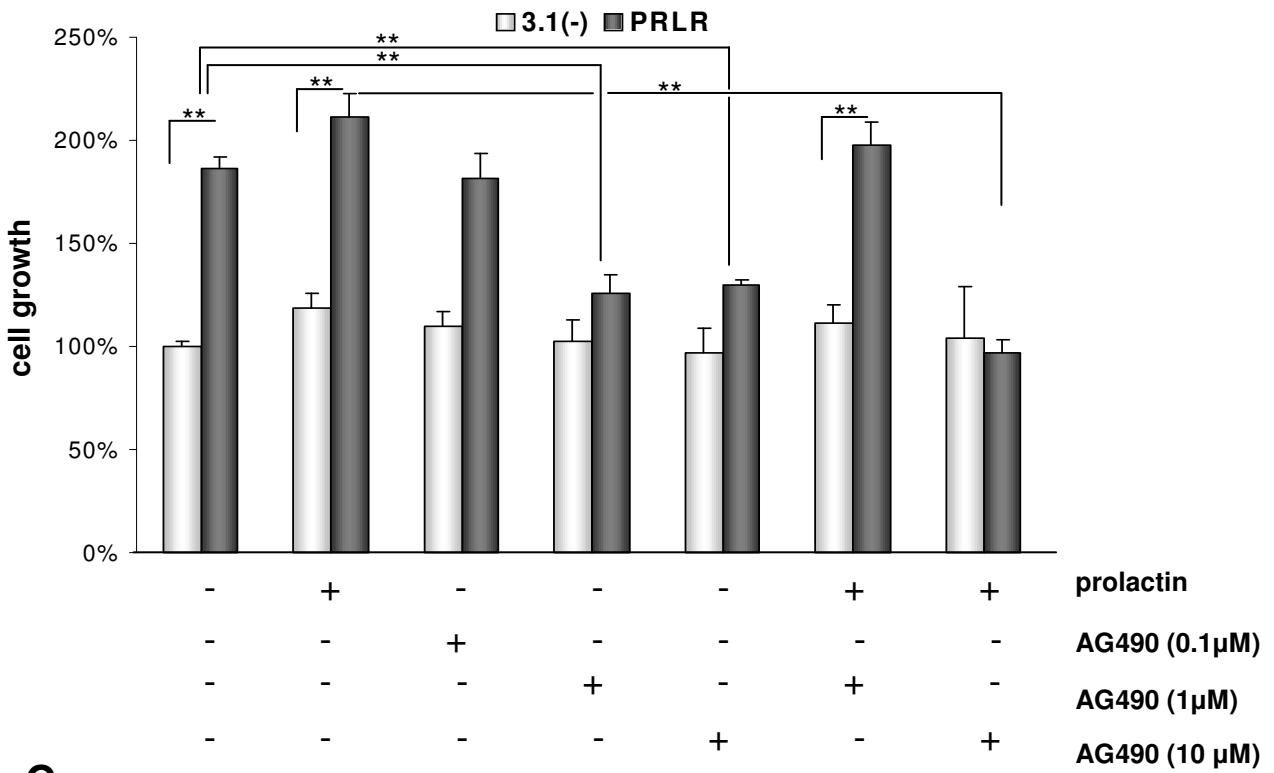

**C**

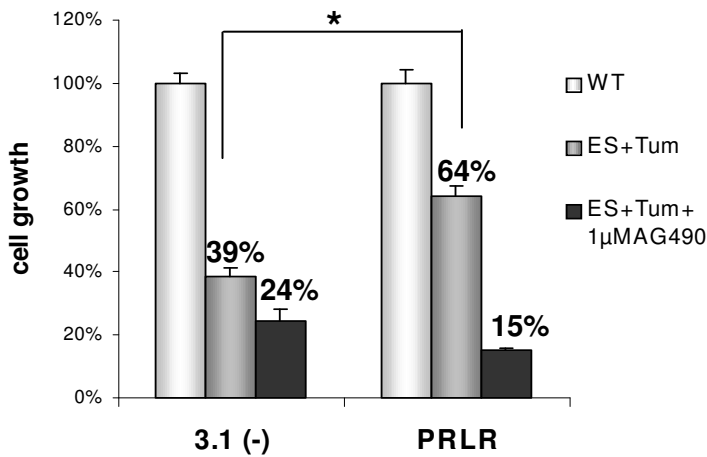

**Figure 7**

Supplement: MOESM10 [file 9552378]
